# Supplementary material
Source: publisher site journal article supplement (http://www.kjim.org/upload/media/kjim-2020-322-suppl4.pdf)
Supplement: Supplementary file 1 [file kjim-2020-322-suppl4.pdf]

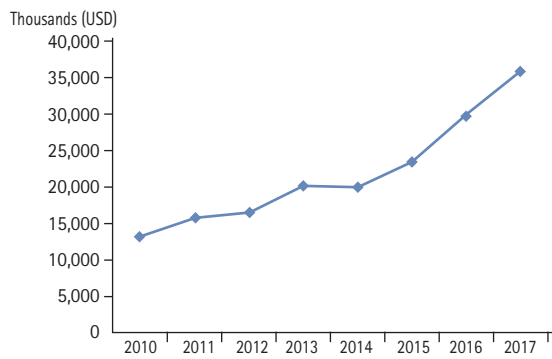

**Supplementary Figure 1.** Annual total healthcare costs for emergency department visit in Korean goat patients from 2010 to 2017.  $p$  for trend = 0.002 and it was analyzed using the Mann-Kendall trend test. USD, US dollar.
